# Supplementary material for: Betting on the fastest horse: Using computer simulation to design a combination HIV intervention for future projects in Maharashtra, India
Source: PubMed Central journal article supplement (PMC5584966; doi:10.1371/journal.pone.0184179), 2017-09-05

**S5 Figure. Histograms of probabilistic analysis for key input variables**

**Proportion of ALCS male**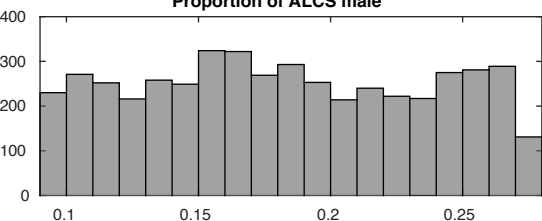**Proportion IDU**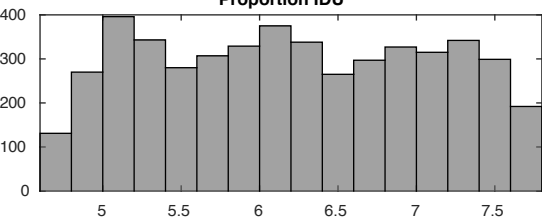**Proportion bi males**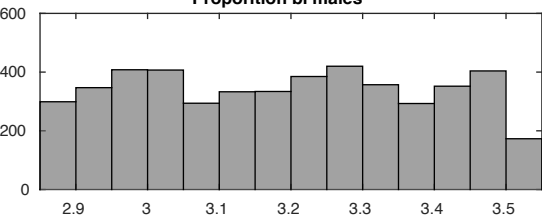**Proportion pregnant women on PMTCT in 2014**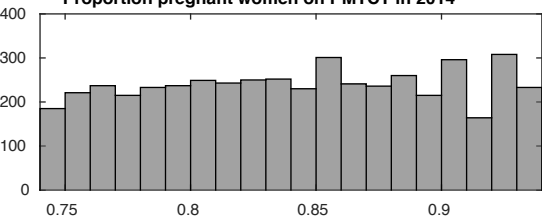**Proportion of ALCS female**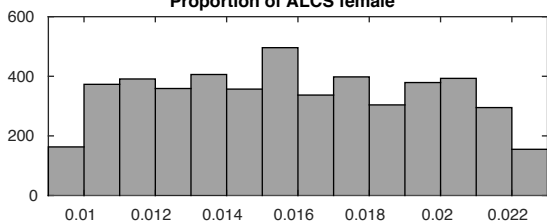**Proportion gay men**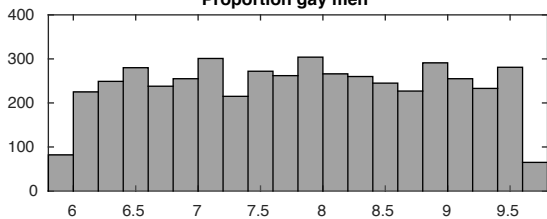**Mortality multiplier <5 year olds**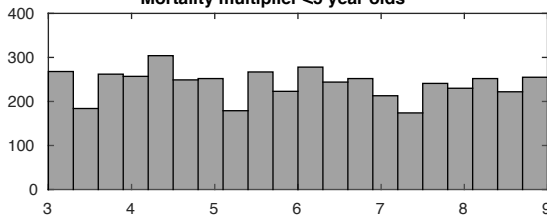**Proportion straight males in ACTO**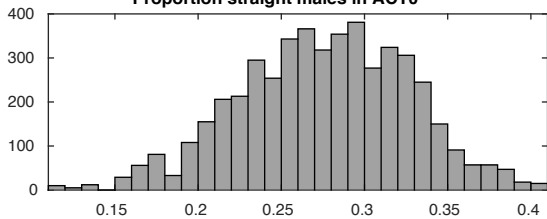

**Proportion straight males in ACT2**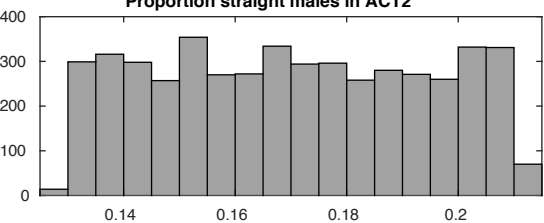**Proportion straight males in ACT3**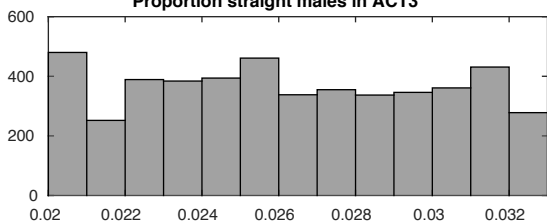**Proportion straight females in ACT0**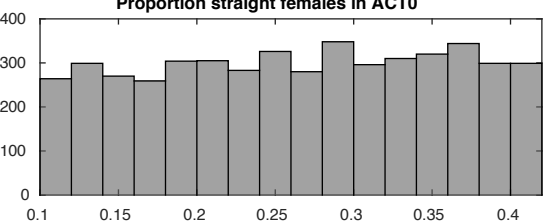**Proportion straight females in ACT2**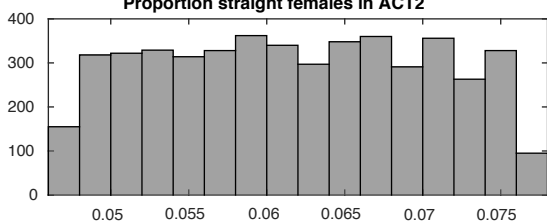**Proportion straight females in ACT3**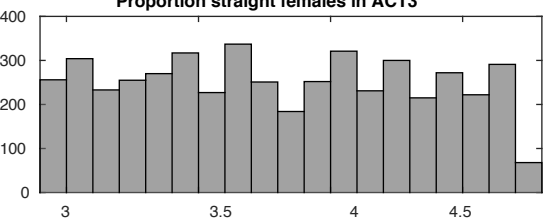**Proportion homosexual males in ACT1,**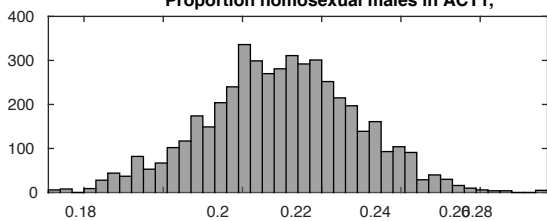**Proportion homosexual males in ACT3**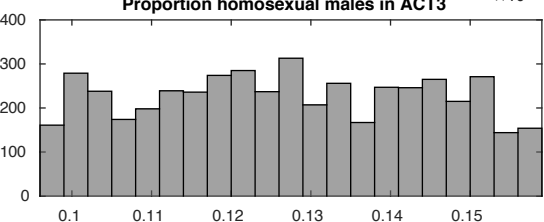**Proportion homosexual females in ACT0**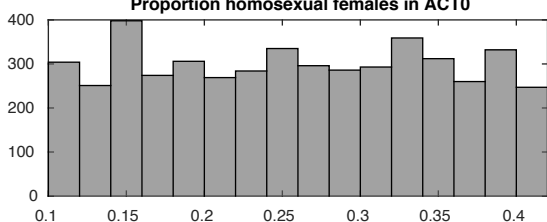

**Proportion homosexual females in ACT2**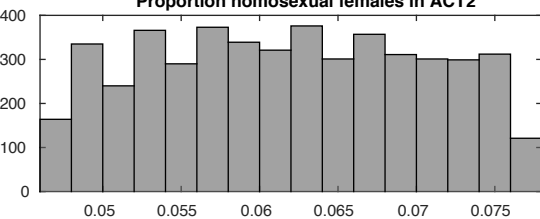**Proportion homosexual females in ACT3**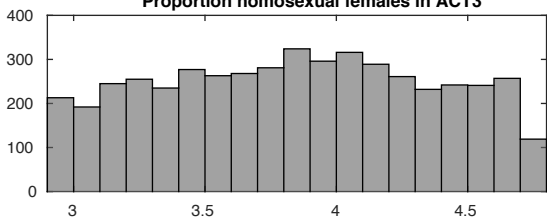**Proportion bi males in ACT1**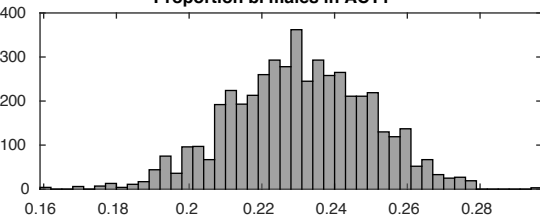**Proportion bi males in ACT3**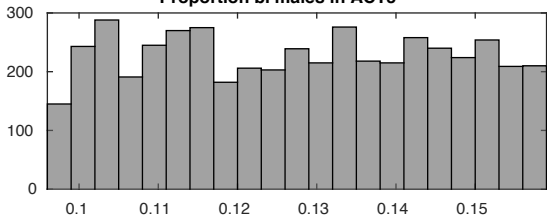**Proportion bi females in ACT0**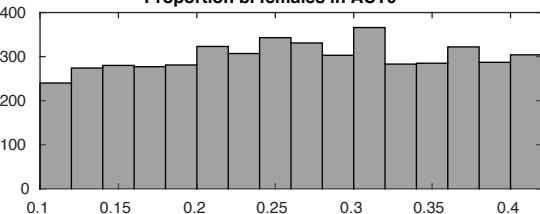**Proportion bi females in ACT2**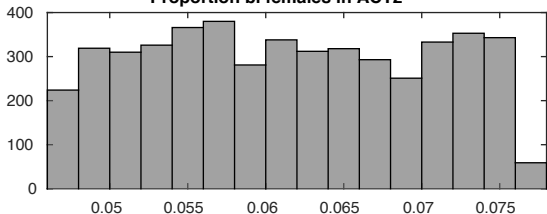**Proportion bi females in ACT3**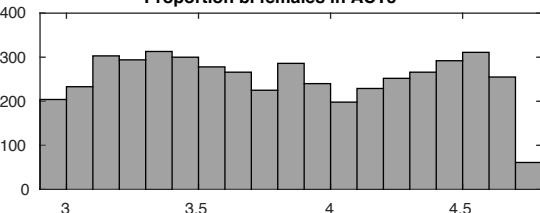**Duration of ACT1 partnership**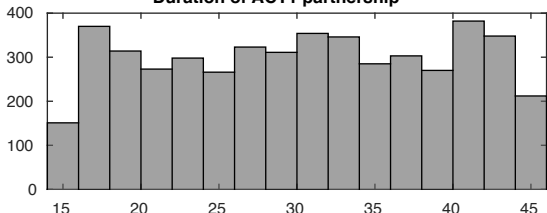

**Duration of ACT2 partnership**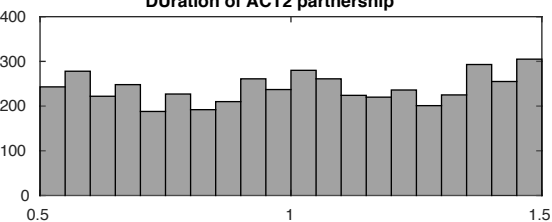**Duration of ACT3 partnership**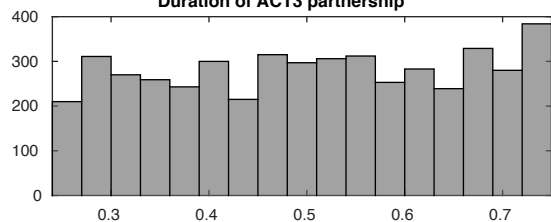**Median number concurrent partnerships ACT2**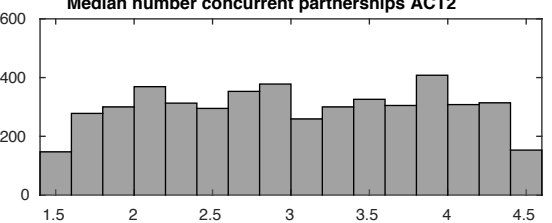**Median number concurrent partnerships ACT3**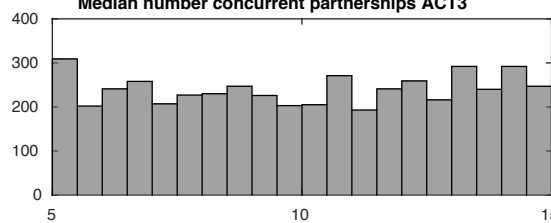**FSW condom multiplier**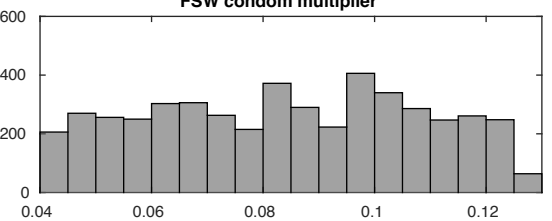**EPS**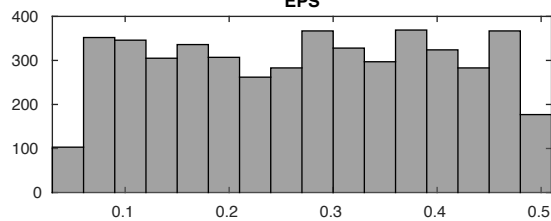**CD4 mean males/females**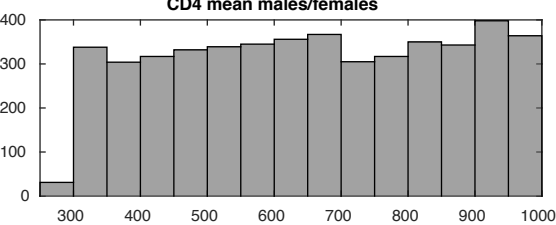**CD4 std males/females**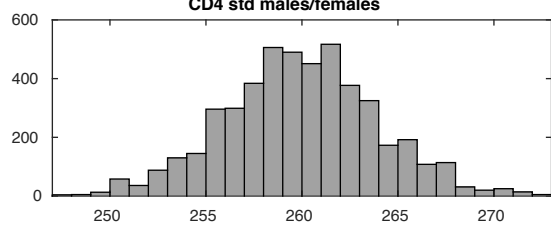

**VL mean males/females**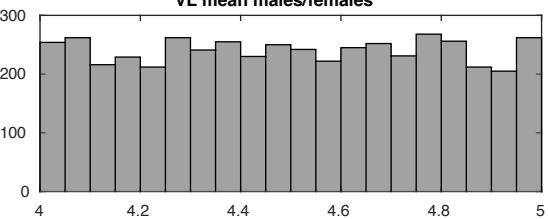**blank**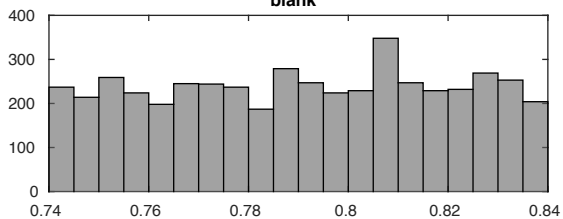**blank**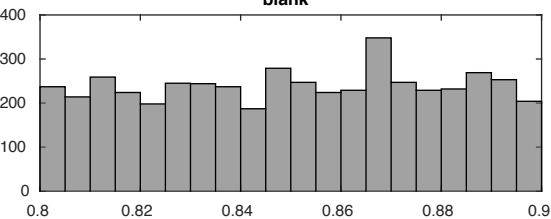**blank**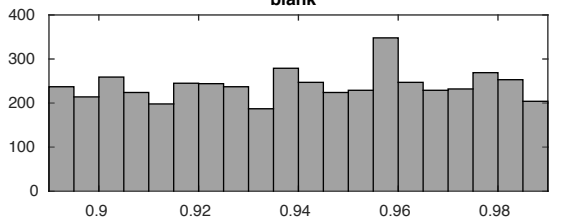**Utility CD4 less than 50**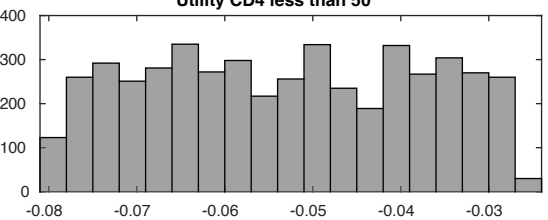**Utility CD4 50 to 200**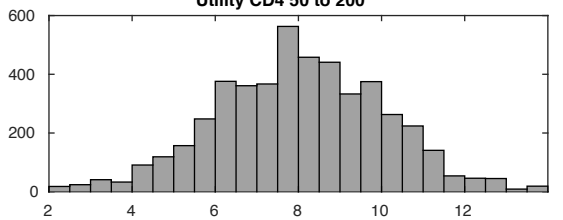**Utility CD4 above 200**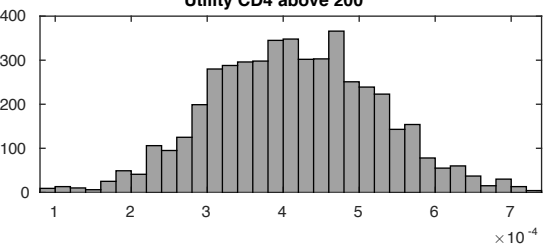**Delta utility with HAART**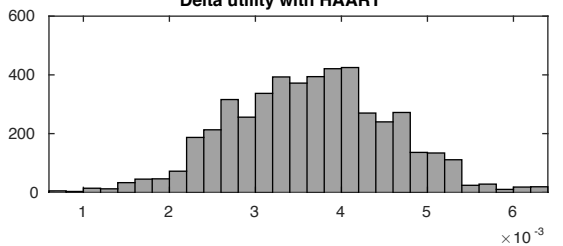

**alpha<sub>raw</sub> male infecting female**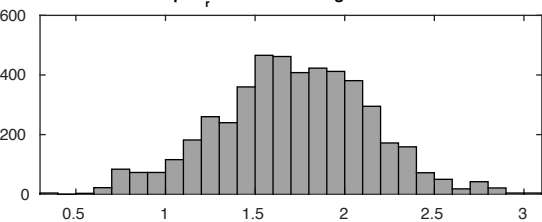**alpha IDU raw**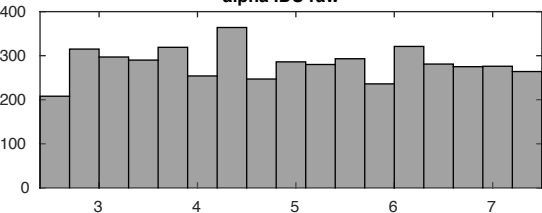**number of shared injections**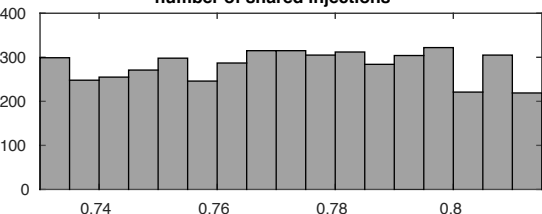**drug alpha scale**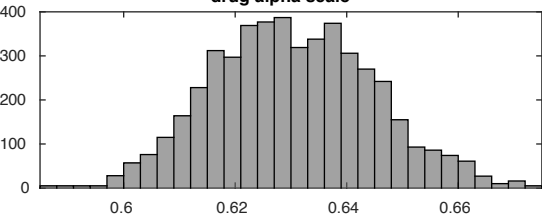**alpha<sub>raw</sub> female infecting male**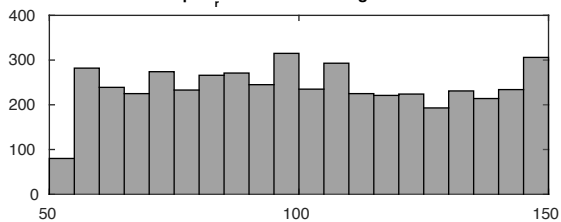**alpha raw male infecting male**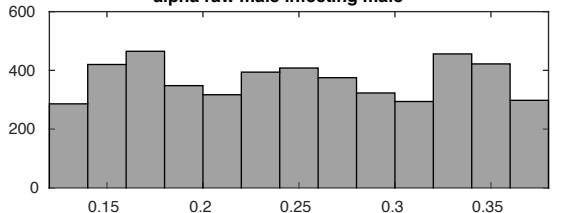**idu partner change rate**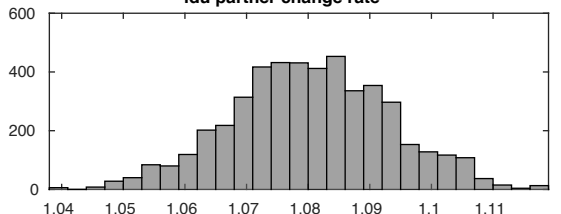**proportion of condom nonuse in the general population**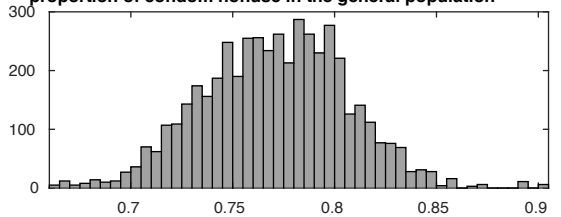

**RR of condom nonuse female vs. male**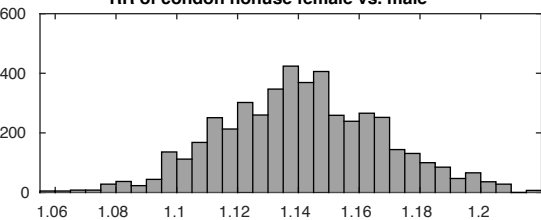**RR of condom nonuse gay vs. straight**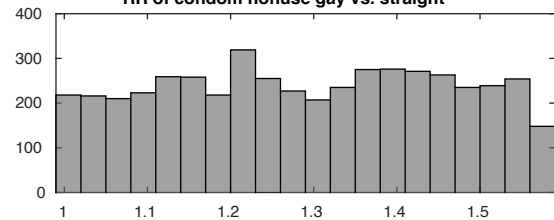**RR of condom nonuse risk 2 vs. risk 1**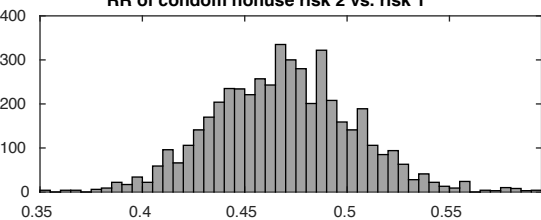**RR of condom nonuse risk3 vs. risk 1**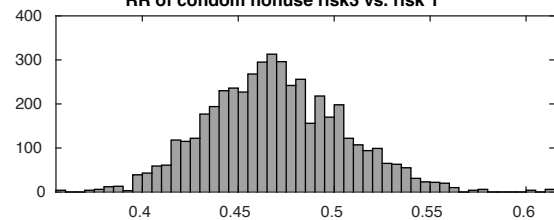**RR of condom nonuse alcohol/drug use vs. not**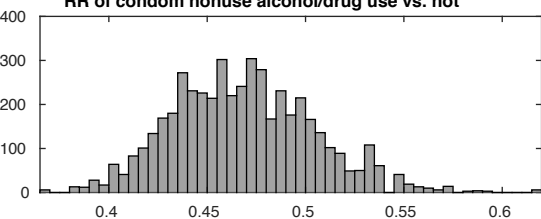**RR of condom nonuse IDU 1 vs. IDU 0**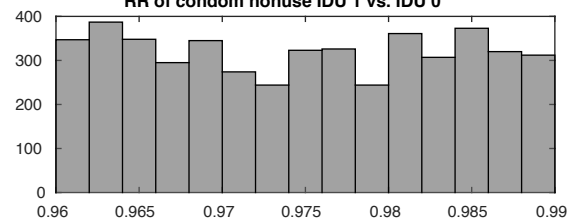**RR of condom nonuse HIV inf detected vs HIV-**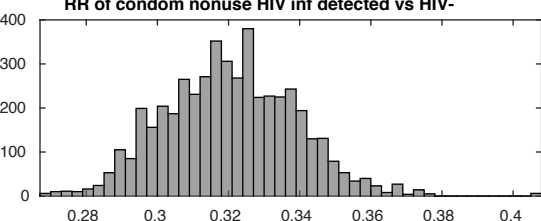**RR of condom nonuse HIV inf on care vs HIV-**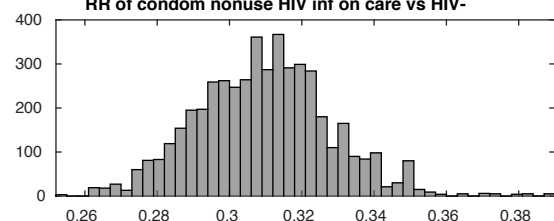



**RR of condom nonuse HIV inf treated vs HIV-**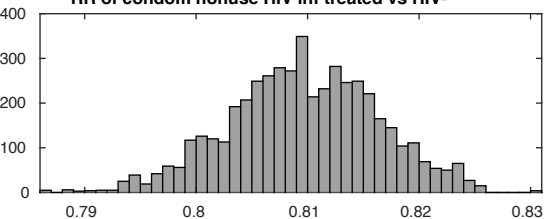**proportion of not being tested for HIV in the general population**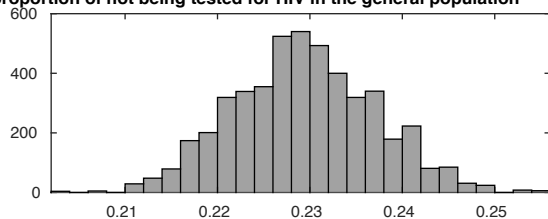**RR of not being tested for HIV gay vs. straight**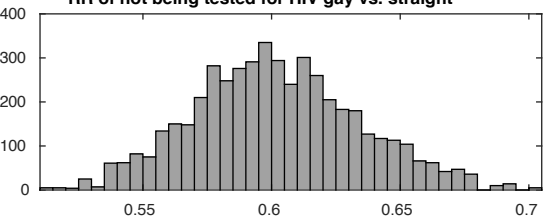**RR of not being tested for HIV bi vs. straight,**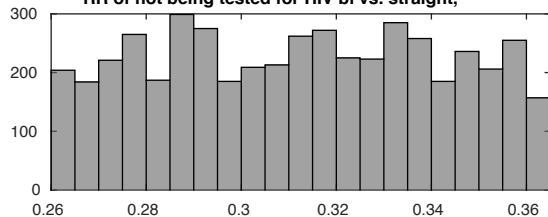**RR of not being tested for HIV risk 2 vs. risk 1**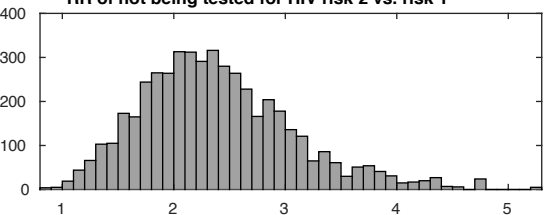**RR of not being tested for HIV risk3 vs. risk 1**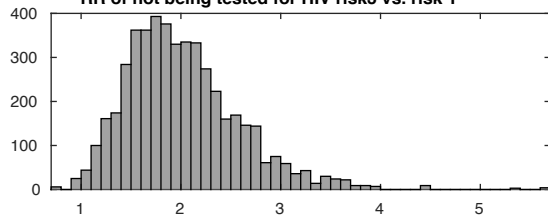**RR of not being tested for HIV IDU 1 vs. IDU 0**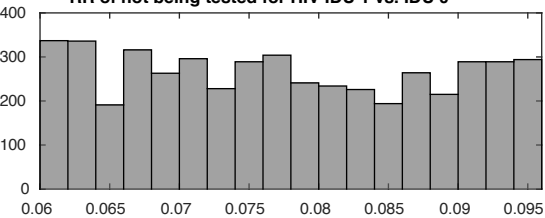**proportion of ART nonadherence in the general population**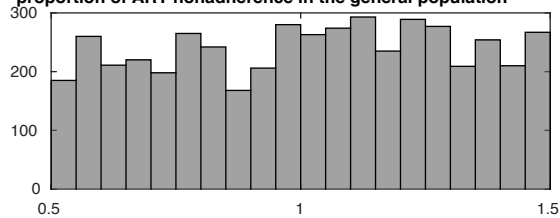

**RR of ART nonadherence alcohol/drug use vs. not**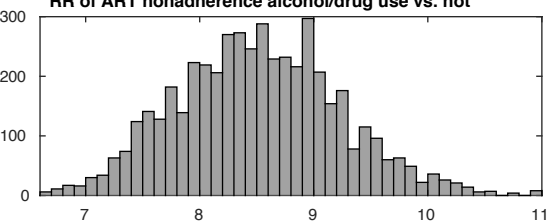**RR of ART nonadherence IDU 1 vs. IDU 0**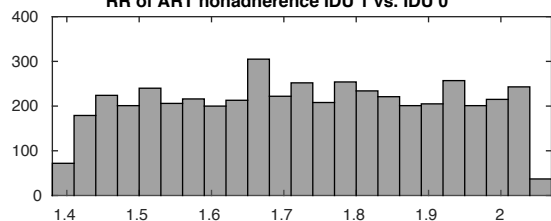**proportion of untreated STI in the general population**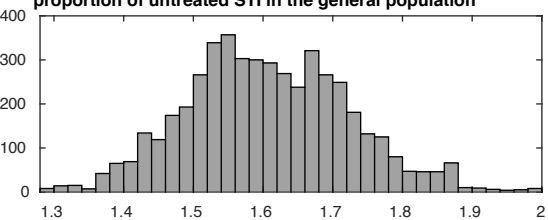**RR of untreated STI female vs. male**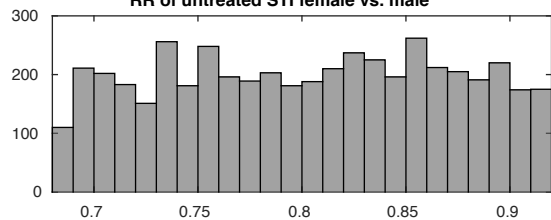**RR of untreated STI risk3 vs. risk 1**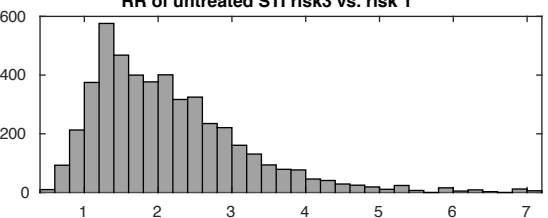**RR of untreated STI alcohol/drug use vs. not**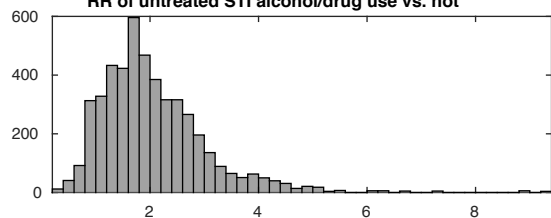**RR of untreated STI IDU 1 vs. IDU 0**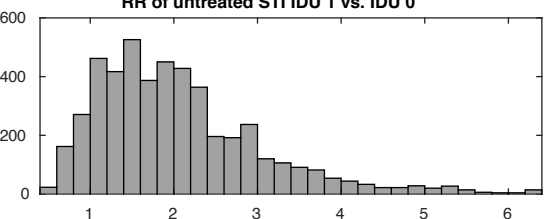**proportion of not being circumcised in the general population**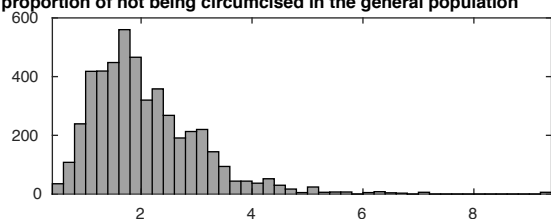

**RR of not being circumcised HIV inf detected vs HIV-**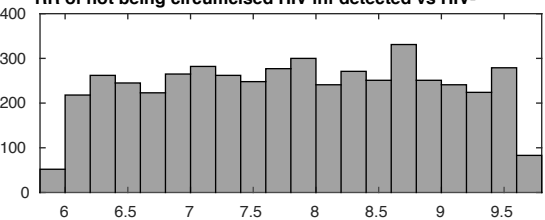**RR of not being circumcised HIV inf on care vs HIV-**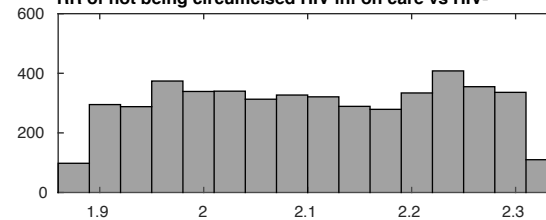**RR of not being circumcised HIV inf unknown vs HIV-  $\times 10^{-4}$** 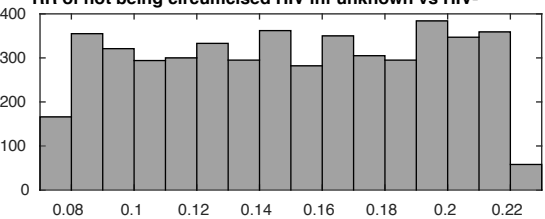**RR of not being circumcised HIV inf treated vs HIV-  $\times 10^{-4}$** 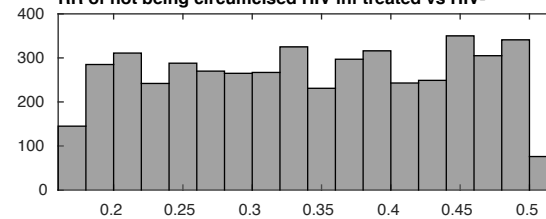**Proportion gay women**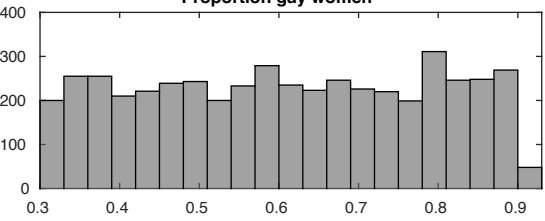**Proportion bi women**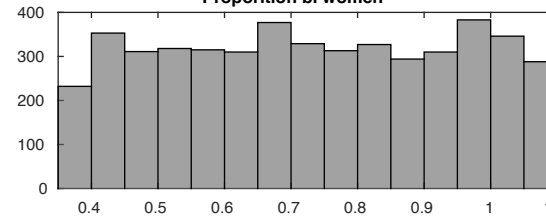**probability of mother to child transmission (VL0)**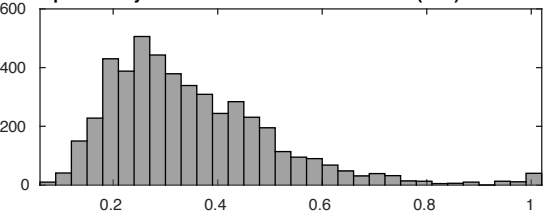**probability of mother to child transmission (VL1)**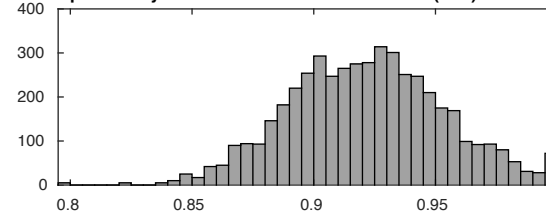

**probability of mother to child transmission (VL2)**

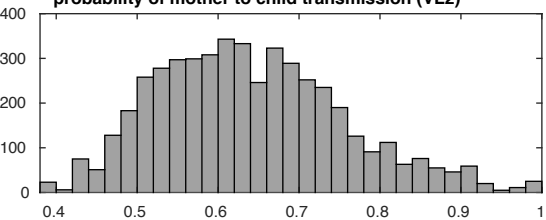

**probability of mother to child transmission (VL4)**

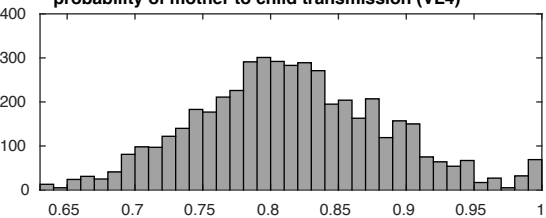

**intervention 19 effect size, path 0**

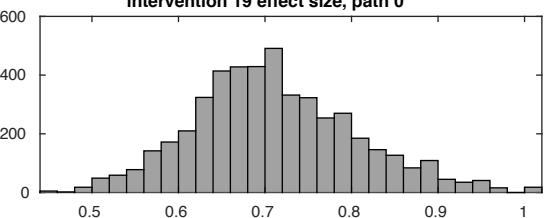

**intervention 20 effect size path 0**

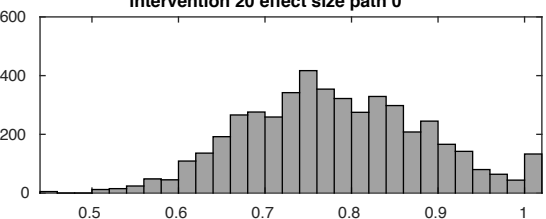

**probability of mother to child transmission (VL3)**

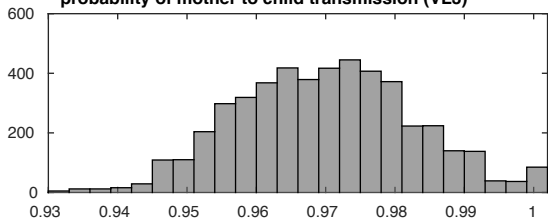

**intervention 10 effect size, path 10**

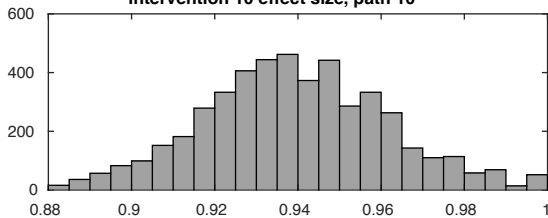

**intervention 19 effect size, path 5**

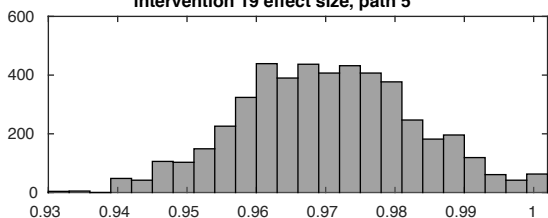

**intervention 20 effect size, path 5**

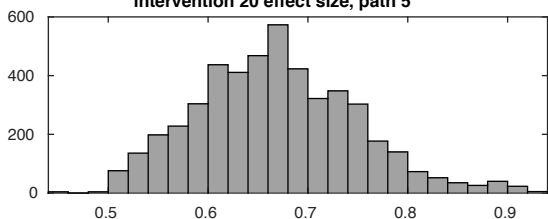

**intervention 21 effect size path 0**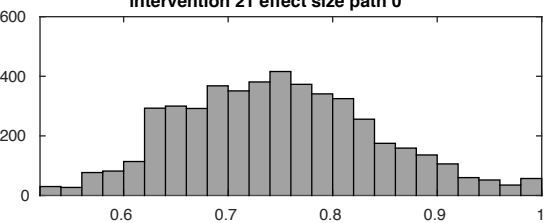**intervention 22 effect size path 0**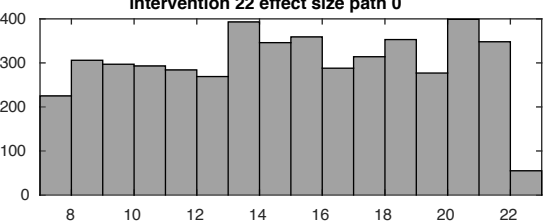**intervention 23 effect size, path 3**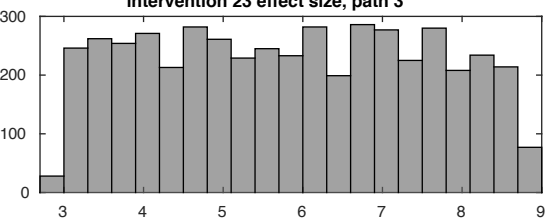**intervention 10 cost**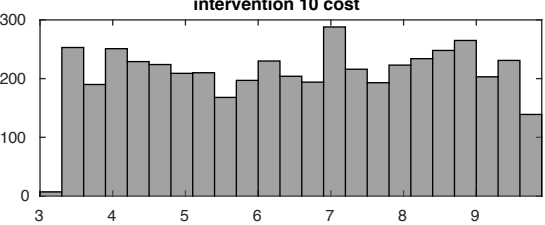**intervention 21 effect size, path 5**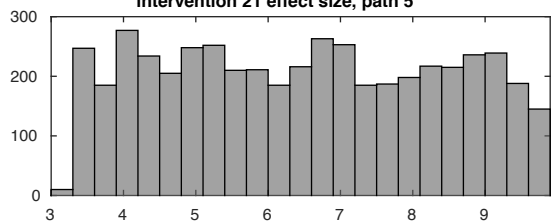**intervention 22 effect size, path 5**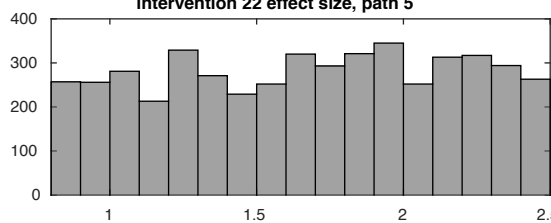**intervention 24 effect size, path 3**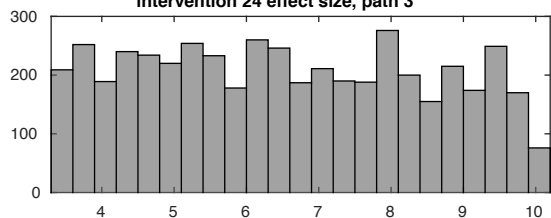**intervention 19 cost**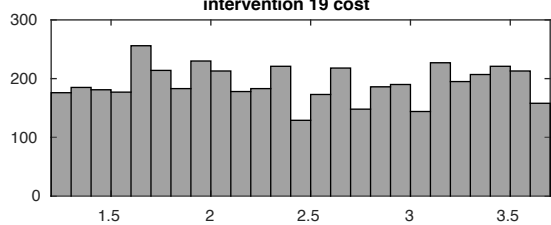

Supplement: pone.0184179.s005.pdf [file pone.0184179.s005.pdf]
