# Supplementary material for: Betting on the fastest horse: Using computer simulation to design a combination HIV intervention for future projects in Maharashtra, India
Source: PubMed Central journal article supplement (PMC5584966; doi:10.1371/journal.pone.0184179), 2017-09-05
Supplement: pone.0184179.s001.pdf [file pone.0184179.s001.pdf]

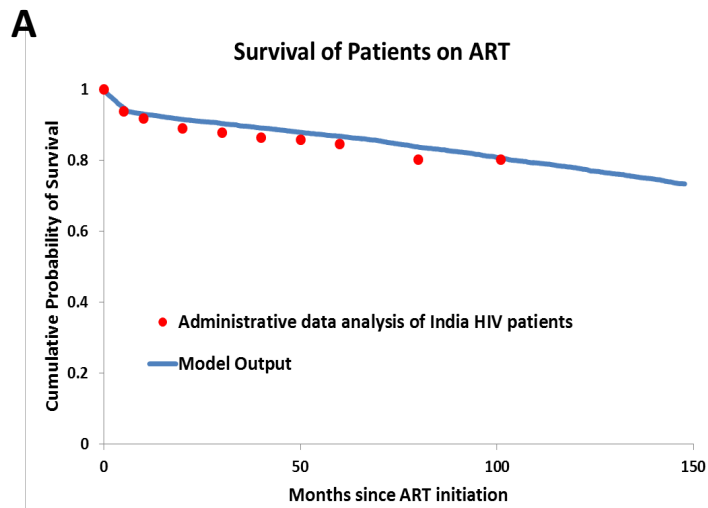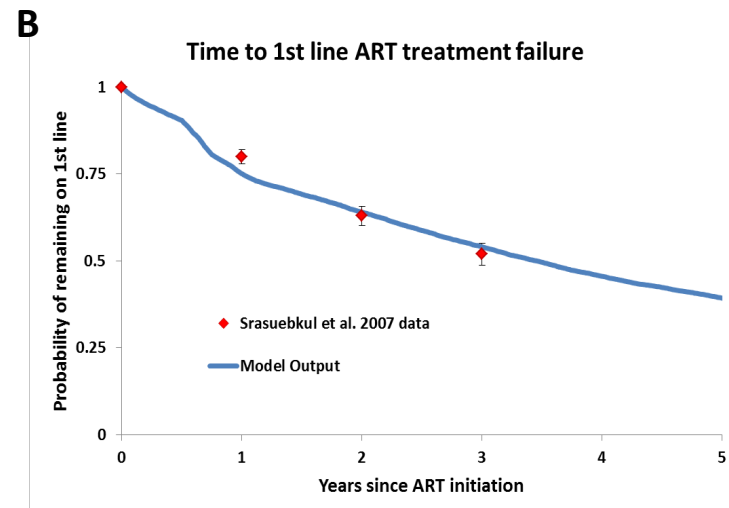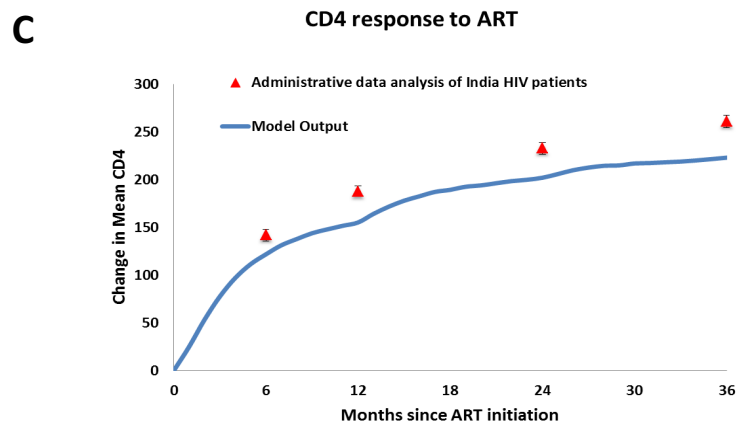

**S1 Fig. Calibration of India-specific HIV progression model a**, Comparing model generated survival curve with administrative data from India. **b**, Comparing model generated time to treatment failure with reported data for India. **c**, Comparing model generated CD4 recovery after ART initiation to administrative data from India.
