# Supplementary material for: Betting on the fastest horse: Using computer simulation to design a combination HIV intervention for future projects in Maharashtra, India
Source: PubMed Central journal article supplement (PMC5584966; doi:10.1371/journal.pone.0184179), 2017-09-05
Supplement: pone.0184179.s004.pdf [file pone.0184179.s004.pdf]

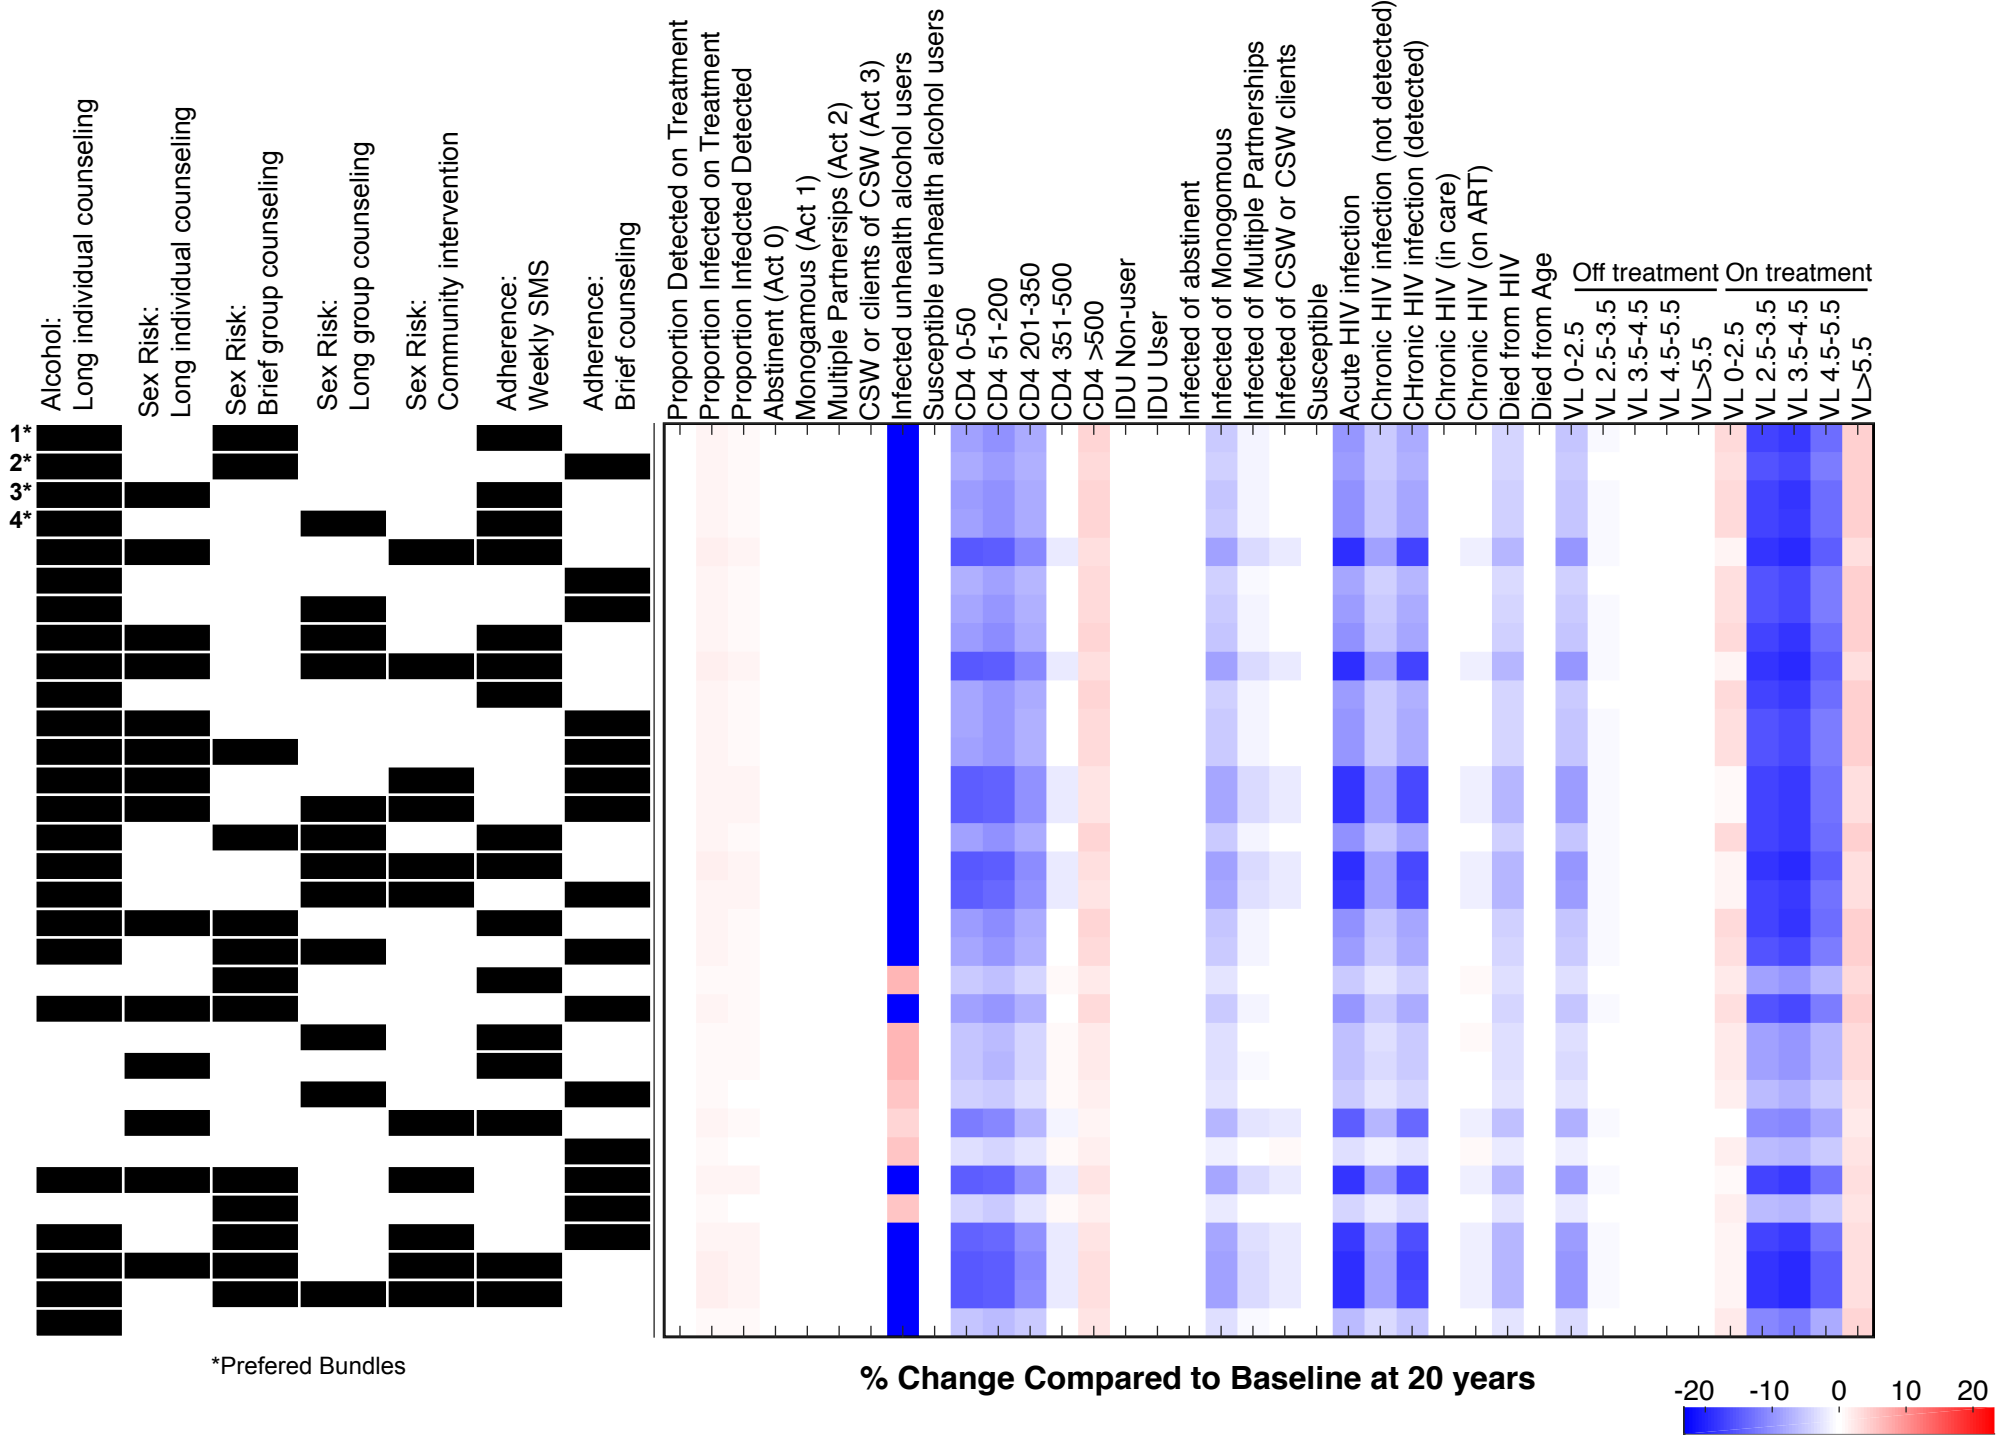

S4 Figure. Compartment dynamics in probabilistic intervention simulations
