# Supplementary material for: Betting on the fastest horse: Using computer simulation to design a combination HIV intervention for future projects in Maharashtra, India
Source: PubMed Central journal article supplement (PMC5584966; doi:10.1371/journal.pone.0184179), 2017-09-05
Supplement: pone.0184179.s006.pdf [file pone.0184179.s006.pdf]

**A** Efficient frontiers varying cost and effectiveness of HIV interventions (N=100)

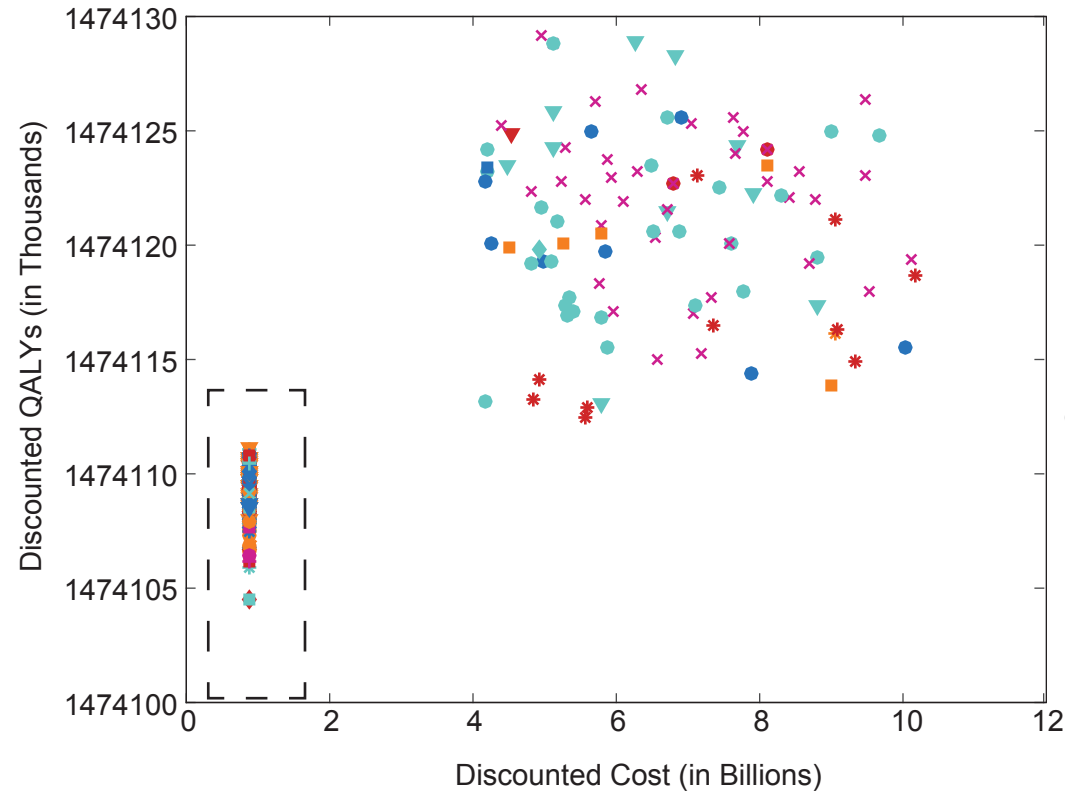

**B** Efficient frontiers varying cost and effectiveness of HIV interventions (N=100)

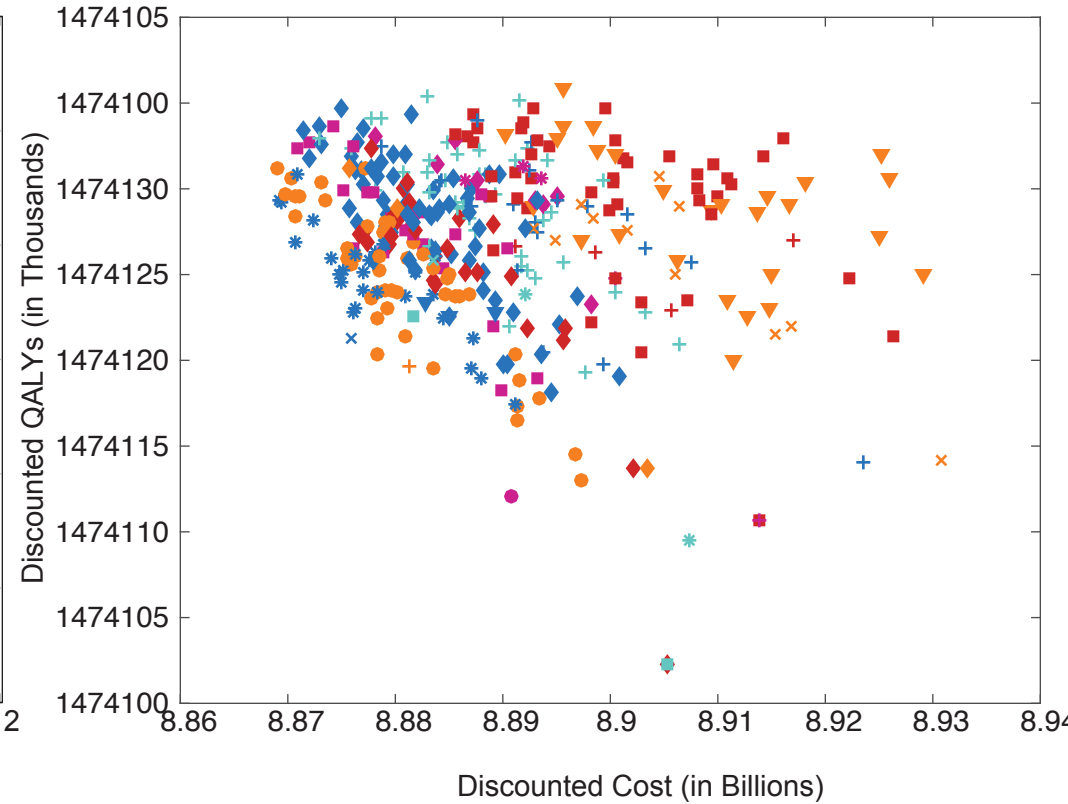

**S6 Figure. Intervention cost and effectiveness probabilistic analysis.** a, Graphical representation of intervention bundles identified on the efficient frontier across 100 probabilistic runs of all combinations of 7 interventions. b, focused for lower end of discounted cost (0.888-0.893 Billion USD). c, intervention bundle details corresponding to a and b.

| Bundle # | Marker | Intervention on Frontier            |                       |                             |                                       |                                 |                                 |                                  | % Times on frontier |
|----------|--------|-------------------------------------|-----------------------|-----------------------------|---------------------------------------|---------------------------------|---------------------------------|----------------------------------|---------------------|
|          |        | Alcohol: Long individual counseling | Adherence: Weekly SMS | Adherence: Brief counseling | Sex Risk : Long individual counseling | Sex risk: Brief group counseing | Sex Risk: Long group counseling | Sex risk: Community intervention |                     |
| 1        | ◆      | X                                   | X                     |                             |                                       | X                               |                                 |                                  | 63                  |
| 2        | ●      | X                                   |                       | X                           |                                       | X                               |                                 |                                  | 47                  |
| 3        | ■      | X                                   | X                     |                             | X                                     |                                 |                                 |                                  | 46                  |
| 4        | +      | X                                   | X                     |                             |                                       |                                 | X                               |                                  | 44                  |
| 5        | ×      | X                                   | X                     |                             | X                                     |                                 |                                 | X                                | 38                  |
| 6        | *      | X                                   |                       | X                           |                                       |                                 |                                 |                                  | 29                  |
| 7        | ▼      | X                                   | X                     |                             | X                                     |                                 | X                               |                                  | 27                  |
| 8        | ◆      | X                                   |                       | X                           |                                       |                                 | X                               |                                  | 27                  |
| 9        | ●      | X                                   | X                     |                             | X                                     |                                 | X                               | X                                | 26                  |
| 10       | ■      | X                                   | X                     |                             |                                       |                                 |                                 |                                  | 22                  |
| 11       | +      | X                                   |                       | X                           | X                                     |                                 |                                 |                                  | 19                  |
| 12       | ×      | X                                   |                       | X                           | X                                     |                                 | X                               |                                  | 12                  |
| 13       | *      | X                                   |                       | X                           | X                                     |                                 | X                               | X                                | 10                  |
| 14       | ▼      | X                                   |                       | X                           | X                                     |                                 |                                 | X                                | 10                  |
| 15       | ◆      | X                                   | X                     |                             |                                       | X                               | X                               |                                  | 9                   |
| 16       | ●      | X                                   | X                     |                             |                                       |                                 | X                               | X                                | 8                   |
| 17       | ■      | X                                   |                       | X                           |                                       |                                 | X                               | X                                | 5                   |
| 18       | +      | X                                   | X                     |                             | X                                     | X                               |                                 |                                  | 4                   |
| 19       | *      | X                                   |                       | X                           | X                                     | X                               |                                 |                                  | 3                   |
| 20       | ◆      | X                                   |                       | X                           |                                       | X                               | X                               |                                  | 3                   |
| 21       | ▼      |                                     | X                     |                             |                                       | X                               |                                 |                                  | 3                   |
| 22       | ×      |                                     | X                     |                             |                                       |                                 | X                               |                                  | 3                   |
| 23       | ●      |                                     | X                     |                             | X                                     |                                 |                                 | X                                | 2                   |
| 24       | +      |                                     | X                     |                             | X                                     |                                 |                                 |                                  | 2                   |
| 25       | ■      |                                     |                       | X                           |                                       |                                 | X                               |                                  | 2                   |
| 26       | ▼      | X                                   | X                     |                             | X                                     | X                               |                                 | X                                | 1                   |
| 27       | *      | X                                   | X                     |                             |                                       | X                               | X                               | X                                | 1                   |
| 28       | ■      | X                                   |                       | X                           | X                                     | X                               |                                 | X                                | 1                   |
| 29       | ◆      | X                                   |                       | X                           |                                       | X                               |                                 | X                                | 1                   |
| 30       | ×      | X                                   |                       |                             |                                       |                                 |                                 |                                  | 1                   |
| 31       | ●      |                                     |                       | X                           |                                       | X                               |                                 |                                  | 1                   |
| 32       | +      |                                     |                       | X                           |                                       |                                 |                                 |                                  | 1                   |

Figure S6. Continued
