# Supplementary material for: Betting on the fastest horse: Using computer simulation to design a combination HIV intervention for future projects in Maharashtra, India
Source: PubMed Central journal article supplement (PMC5584966; doi:10.1371/journal.pone.0184179), 2017-09-05
Supplement: pone.0184179.s008.pdf [file pone.0184179.s008.pdf]

## S1 Table. Key model inputs

| Sexual Risk Characteristics                                                      | Base Case | Probabilistic Range | Distribution | Ref.       |
|----------------------------------------------------------------------------------|-----------|---------------------|--------------|------------|
| Age of Sexual Debut                                                              | 19        | 17-21               | Uniform      | 29         |
| Proportion of men who are homosexual                                             | 0.06%     | 0.06%-0.1%          | Uniform      | 28         |
| Proportion of men who are bisexual                                               | 0.04%     | 0.029%-0.035%       | Normal       | 28         |
| Proportion of women who are homosexual                                           | 0.06%     | ---                 | ---          | Assumption |
| Proportion of women who are bisexual                                             | 0.04%     | ---                 | ---          | Assumption |
| Proportion of straight males who are abstinent                                   | 27.75%    | 21%-41%             | Normal       | 32         |
| Proportion of straight males who are in stable, monogamous relationships         | 57.33%    | --                  | --           | 32         |
| Proportion of straight males in multiple, concurrent relationships (Class 3)     | 12.9%     | 12.9%-21.2%         | Normal       | 32         |
| Proportion of straight males in multiple, concurrent relationships (Class 4)     | 2.0%      | 2%-3.3%             | Uniform      | 30         |
| Proportion of bisexual males who are abstinent                                   | 0%        | ---                 | ---          | --         |
| Proportion of bisexual males who are in stable, monogamous relationships         | 23.0%     | 15.41%-30.35%       | Normal       | 28         |
| Proportion of bisexual males in multiple, concurrent relationships (Class 3)     | 67.5%     | ---                 | ---          | --         |
| Proportion of bisexual males in multiple, concurrent relationships (Class 4)     | 9.5%      | 7.44%-11.98%        | Normal       | 28         |
| Proportion of homosexual males who are abstinent                                 | 0%        | ---                 | ---          | --         |
| Proportion of homosexual males who are in stable, monogamous relationships       | 23.0%     | 15.41%-30.35%       | Normal       | 28         |
| Proportion of homosexual males in multiple, concurrent relationships (Class 3)   | 67.5%     | ---                 | ---          | --         |
| Proportion of homosexual males in multiple, concurrent relationships (Class 4)   | 9.5%      | 7.44%-11.98%        | Normal       | 28         |
| Proportion of straight females who are abstinent                                 | 26.0%     | 12.27%-43.78%       | Normal       | 29         |
| Proportion of straight females who are in stable, monogamous relationships       | 69.0%     | 53.45%-84.78%       | Normal       | 29         |
| Proportion of straight females in multiple, concurrent relationships (Class 3)   | 4.7%      | 1.99%-2.73%         | Normal       | 29         |
| Proportion of straight females in multiple, concurrent relationships (Class 4)   | 0.3%      | 0.3%-3%             | Uniform      | 30         |
| Proportion of bisexual females who are abstinent                                 | 26.0%     | 12.27%-43.78%       | Normal       | 29         |
| Proportion of bisexual females who are in stable, monogamous relationships       | 69.0%     | 53.45%-84.78%       | Normal       | 29         |
| Proportion of bisexual females in multiple, concurrent relationships (Class 3)   | 4.7%      | 1.99%-2.73%         | Normal       | 29         |
| Proportion of bisexual females in multiple, concurrent relationships (Class 4)   | 0.3%      | 0.3%-3%             | Uniform      | 30         |
| Proportion of homosexual females who are abstinent                               | 26.0%     | 12.27%-43.78%       | Normal       | 29         |
| Proportion of homosexual females who are in stable, monogamous relationships     | 69.0%     | 53.45%-84.78%       | Normal       | 29         |
| Proportion of homosexual females in multiple, concurrent relationships (Class 3) | 4.7%      | 1.99%-2.73%         | Normal       | 29         |
| Proportion of homosexual females in multiple, concurrent relationships (Class 4) | 0.3%      | 0.3%-3%             | Uniform      | 30         |

**S1 Table. Key model inputs (continued)**

| HIV Transmission                                                                                      | Base Case | Sensitivity Range | Distribution | Ref.       |
|-------------------------------------------------------------------------------------------------------|-----------|-------------------|--------------|------------|
| <b>Sexual Transmission</b>                                                                            |           |                   |              |            |
| Transmission risk per sex act (F→M)                                                                   | 0.00042   | 0.5x-1.5x         | normal       | 60         |
| Transmission risk per sex act (M→F)                                                                   | 0.00081   | 0.5x-1.5x         | normal       | 60         |
| Transmission risk per sex act (M→M)                                                                   | 0.00169   | 0.5x-1.5x         | normal       | 60         |
| Relative risk of transmission if VL category 0-2.5 log copies/ml                                      | 0.16      | --                | --           | 62         |
| Relative risk of transmission if VL category 2.5-3.5 log copies/ml                                    | 1.87      | --                | --           | 62         |
| Relative risk of transmission if VL category 3.5-4.5 log copies/ml                                    | 6.54      | --                | --           | 62         |
| Relative risk of transmission if VL category 4.5-5.5 log copies/ml                                    | 8.85      | --                | --           | 62         |
| Relative risk of transmission if VL category >5.5 log copies/ml                                       | 9.03      | --                | --           | 62         |
| Degree of assortative mixing between age and sexual activity classes (0=assortative, 1=proportionate) | 0.20      | 0.05-0.50         | uniform      | 56         |
| Average duration (years) of stable, monogamous partnerships                                           | 30.0      | 0.5x-1.5x         | uniform      | 2          |
| Average duration (years) of partnership in activity group 2                                           | 1.0       | 0.5x-1.5x         | uniform      | 2          |
| Average duration (years) of partnership in activity group 3                                           | 0.5       | 0.5x-1.5x         | uniform      | 2          |
| Median number of concurrent partnerships for activity group 1                                         | 1.0       | --                | --           | 55         |
| Median number of concurrent partnerships for activity group 2                                         | 3.0       | 0.5x-1.5x         | uniform      | 55         |
| Median number of concurrent partnerships for activity group 3                                         | 10.0      | 0.5x-1.5x         | uniform      | 55         |
| Relative risk reduction of HIV seroconversion when using condoms                                      | 0.80      | --                | --           | 65         |
| Relative risk reduction of HIV seroconversion if treated STI                                          | 0.40      | --                | --           | 66         |
| Relative risk reduction of HIV seroconversion if circumcised                                          | 0.59      | --                | --           | 67         |
| <b>Injection Drug Use</b>                                                                             |           |                   |              |            |
| Transmission risk per injection                                                                       | 0.0036    | 0.5x-1.5x         | normal       | 61         |
| Proportion of population that uses IV drugs                                                           | 4.99E-5   | 0.0018-0.0054     | uniform      | 28         |
| Proportion of IDU with unsafe injection practices                                                     | 32%       | --                | --           | Assumption |
| Number of needle sharing partners per year                                                            | 5         | 0.5x-1.5x         | uniform      | 63         |
| Shared injections per year                                                                            | 102       | 54-150            | Uniform      | 61         |

**S1 Table. Key model inputs (continued)**

| <b>Biological/behavioral modifiers of transmission</b> | <b>Base Case</b> | <b>Sensitivity Range</b> | <b>Distribution</b> | <b>Ref.</b> |
|--------------------------------------------------------|------------------|--------------------------|---------------------|-------------|
| <b>General Population Risk</b>                         |                  |                          |                     |             |
| Prevalence of untreated STI                            | 0.06             | 0.06-0.10                | Normal              | 59          |
| Probability of not being circumcised                   | 0.80             | 0.68-0.92                | Uniform             | 68          |
| Prevalence of condom nonuse most or all of the time    | 0.73             | 0.73-0.82                | Normal              | 29          |
| Probability/rate of not being tested for HIV           | 0.98             | 0.947-0.999              | Uniform             | 31          |
| Probability of linkage to care once HIV diagnosed      | 0.30             | ---                      | ---                 |             |
| Prevalence of ART non-adherence                        | 0.26             | 0.26-0.36                | Normal              | 58          |
| Probability of loss to follow-up                       | 0.26             | 0.23-0.29                | Normal              | 69          |
| <b>Female vs. Male</b>                                 |                  |                          |                     |             |
|                                                        | <b>RR</b>        |                          |                     |             |
| RR of condom non-use                                   | 1.08             | 1.06 – 1.11              | Log-Normal          | 70          |
| <b>Homosexual vs. Straight</b>                         |                  |                          |                     |             |
|                                                        | <b>RR</b>        |                          |                     |             |
| RR of condom non-use                                   | 0.63             | 0.6 – 0.66               | Log-Normal          | 71          |
| RR of not being tested for HIV                         | 0.31             | 0.28 – 0.35              | Log-Normal          | 71          |
| <b>Bisexual vs Straight</b>                            |                  |                          |                     |             |
|                                                        | <b>RR</b>        |                          |                     |             |
| RR of not being tested for HIV                         | 0.31             | 0.28 – 0.35              | Log-Normal          | Assumption  |
| <b>Non-monogamous vs. monogamous</b>                   |                  |                          |                     |             |
|                                                        | <b>RR</b>        |                          |                     |             |
| RR of condom non-use                                   | 1.14             | 1.13 – 1.16              | Log-Normal          | 71          |
| RR of not being tested for HIV                         | 0.81             | 0.79 – 0.82              | Log-Normal          | 71          |
| <b>High risk (class 4) vs. monoagmous</b>              |                  |                          |                     |             |
|                                                        | <b>RR</b>        |                          |                     |             |
| RR of condom non-use                                   | 0.16             | 0.15 – 0.18              | Log-Normal          | 71          |
| RR of not being tested for HIV                         | 0.23             | 0.22 – 0.25              | Log-Normal          | 71          |
| RR of untreated STI                                    | 8.85             | 7.4 – 10.3               | Log-Normal          | 70          |
| <b>Alcohol use vs. non alcohol use</b>                 |                  |                          |                     |             |
|                                                        | <b>RR</b>        |                          |                     |             |
| RR of condom non-use                                   | 1.29             | 1 – 1.58                 | Uniform             | 36          |
| RR of ART non-adherence                                | 2.33             | 1.17 – 3.5               | Uniform             | 38,39,41    |
| RR of untreated STI                                    | 1.72             | 1.4 – 2.05               | Uniform             | 43,72,73    |
| <b>IDU vs. non-IDU</b>                                 |                  |                          |                     |             |
|                                                        | <b>RR</b>        |                          |                     |             |
| RR of condom non-use                                   | 0.62             | 0.55 – 0.7               | Log-Normal          | 71          |
| RR of not being tested for HIV                         | 0.6              | 0.54 – 0.67              | Log-Normal          | 71          |
| RR of ART non-adherence                                | 2                | 1 – 3                    | Normal              | Assumption  |
| RR of untreated STI                                    | 1.43             | 1.22 – 1.63              | Log-Normal          | 71          |
| RR of LTFU prior to linkage                            | 2                | 1 – 3                    | Normal              | Assumption  |
| <b>HIV+ vs. HIV-</b>                                   |                  |                          |                     |             |
|                                                        | <b>RR</b>        |                          |                     |             |
| RR of condom non-use                                   | 0.47             | 0.4 – 0.54               | Log-Normal          | 74          |
| RR of not being circumcised                            | 2.22             | 1.16 – 6.67              | Log-Normal          | 75          |

**S1 Table. Key model inputs (continued)**

| <b>HIV disease related demographics</b>                    | <b>Base Case</b> | <b>Sensitivity Range</b> | <b>Distribution</b> | <b>Ref.</b> |
|------------------------------------------------------------|------------------|--------------------------|---------------------|-------------|
| Mean CD4 count (SD) for newly infected individuals         | 644 (260)        | 294-994 (65-585)         | Uniform (Normal)    | 33          |
| Mean log viral load (SD) for newly infected females        | 4.46<br>(0.99)   | 4-5                      | Uniform             | 33          |
| CD4 count threshold for treatment initiation               | 200              | ---                      | ---                 | 76          |
| Fertility rate (range, depending on age)                   | 0.0027-<br>0.23  | ---                      | ---                 | 77          |
| <b>Costs (2014 USD)</b>                                    |                  |                          |                     |             |
| 1 <sup>st</sup> line ART monthly costs                     | \$11.86          | --                       | --                  | 47          |
| 2 <sup>nd</sup> line ART monthly costs                     | \$49.27          | --                       | --                  | 47          |
| Annual routine costs if in HIV care and treatment program  | \$132.18         | --                       | --                  | 49          |
| Annual inpatient hospitalization costs if patient has AIDS | \$347.25         | --                       | --                  | 49          |
| HIV-1 viral load test                                      | \$49.54          | --                       | --                  | 47          |
| CD4+ count test                                            | \$6.32           | --                       | --                  | 47          |
| Initial proportion alcohol abuse problems, males           | 0.185            | 0.0925-0.2775            | Normal              | 57          |
| Initial proportion alcohol abuse problems, females         | 0.020            | 0.0096-0.0224            | Normal              | Assumption  |
